# Supplementary material for: The ubiquitin E3 ligase ARIH1 regulates hnRNP E1 protein stability, EMT and breast cancer progression
Source: PubMed Central journal article supplement (PMC8933277; doi:10.1038/s41388-022-02199-9), 2022-01-31
Supplement: 41388_2022_2199_MOESM1_ESM.pdf [file 41388_2022_2199_MOESM1_ESM.pdf]

## Supplemental Figure legends

**Figure S1. (a)** Expression of hnRNP E1 transcript levels in NMuMG cells treated with TGF $\beta$ .  $\beta$ Actin was used as a loading control. **(b)** Polysome profiling of NMuMG cells either untreated or treated with TGF $\beta$  for 7 days. hnRNP E1 is actively translated under both conditions, whereas, the positive control inhibin  $\beta$ A shifts to heavier polysome fractions following TGF $\beta$  treatment. **(c)** Immunoblot of hnRNP E1 and Hsp90 (loading control) following treatment of NMuMG cells with cycloheximide for 12h and co-treatment with either the ER-Golgi trafficking inhibitor Brefeldin A, the lysosome inhibitor chloroquine or the proteasome inhibitor MG132. **(d)** Interaction between hnRNP E1 and ARIH1 in yeast 2 hybrid assay. Growth observed on Leu-/Trp-/Ade- plates indicating interaction between hnRNP E1 and ARIH1. **(e)** Immunoblot of hnRNP E1, ARIH1 and Hsp90 (loading control) following ARIH1 siRNA in NMuMG cells. **(f)** hnRNP E1 protein levels following treatment with the neddylation inhibitor MLN4924. **(g)** Immunoprecipitation of exogenous V5 tagged hnRNP E1 followed by K63 ubiquitin immunoblot. **(h)** Protein stability, assessed by cycloheximide chase assay, of WT and K314R or K351R mutant V5-tagged hnRNP E1 with or without MG132 treatment.

**Figure S2. (a)** Transcript levels of the epithelial marker, E-cadherin, in NMuMG cells treated with TGF $\beta$ , as determined by semi-quantitative PCR.  $\beta$ Actin was used as a loading control. **(b)** Rhodamine phalloidin staining of actin in NMuMG control and ARIH1 KD cells following 2 d of TGF $\beta$  treatment. **(c)** 3D invasion assay of NMuMG control and ARIH1 KD cells; representative images of invasion in Matrigel, invasive areas are delineated. **(d)** Immunoblot of ARIH1 expression levels in SUM159 control and ARIH1 ORF cells and SUM159 scrambled control and ARIH1 KD clones (sh5 and sh11). Hsp90 was used as a loading control. **(e)** Protein levels of hnRNP E1 in cycloheximide-treated SUM159 scrambled control and ARIH1 KD cells. Hsp90 is used as a loading control. **(f)** Proliferation of SUM159 WT, scrambled control and ARIH1 KD cells, as assessed by MTT assay. **(g)** Immunoblot of ARIH1 expression levels in LM2 scrambled control

(scram) and ARIH1 sh8 KD cells. Hsp90 was used as a loading control. **(h)** Proliferation rates of LM2 scrambled control and ARIH1 KD cells.

**Figure S3. (a)** Protein levels of hnRNP E1 and the mesenchymal markers N-Cadherin and Vimentin in TGF $\beta$ -treated SUM159 control and ARIH1 ORF cells. **(b)** 2D invasion assay of SUM159 control and ARIH1 ORF cells; representative images of invasive cells (left panel) and quantitation (Mean  $\pm$  SD, unpaired t-test compared to control; \* =  $P < 0.05$ ). **(c)** 3D invasion assay of SUM159 control and ARIH1 ORF cells; representative images of invasion in Matrigel. **(d)** Mammosphere assay of SUM159 control and ARIH1 ORF cells; representative images of spheres and quantitation of sphere number (Mean  $\pm$  SEM, paired t-test compared to control was not significant). **(e)** Image of excised tumors from mice injected with SUM159 cells stably expressing scrambled control. **(f)** Image of excised tumors from mice injected with SUM159 control and ARIH1 ORF cells. **(g)** Tumor volumes in NOD-SCID mice mammary fat pad injected with SUM159 control and ARIH1 ORF cells (mean  $\pm$  SEM). **(h)** Quantitation of tumor weight following xenograft of SUM159 control and ARIH1 ORF cells (n = 9 control xenografts, n = 7 ORF xenografts; mean + SEM, unpaired t-test; n.s = not significant).

**Figure S4. (a)** Protein levels of Vimentin and CD44 in LM2 scrambled control, ARIH1 Sh8 KD cells and ARIH1 sh8 KD with hnRNP E1 silencing (CRISPR 50 and 52). **(b)** Proliferation rates of LM2 scrambled control cells, ARIH1 sh8 KD cells and ARIH1 sh8 KD cells with hnRNP E1 silencing. **(c)** Representative image of excised tumors and **(d)** tumor weights from mice injected with LM2 ARIH1 sh8 E1 CRISPR 50 and 52. **(e)** Quantitation of 2D invasion, following crystal violet stain extraction, using LM2 ARIH1 KD cells and ARIH1 KD with hnRNP E1 silencing (mean +SD). **(f)** Representative images of 3D invasion assay with LM2 scrambled control cells and ARIH1 KD cells with hnRNP E1 silencing. **(g)** Protein levels of hnRNP E1 in SUM159 ARIH1 KD cells with hnRNP E1 CRISPR. **(h)** Proliferation rates of parental SUM159 ARIH1 KD cells and ARIH1 KD cells with hnRNP E1 CRISPR. **(i)** Representative

images of 3D invasion assay with SUM159 scrambled control cells, ARIH1 KD cells and ARIH1 KD cells with hnRNP E1 silencing. **(j)** Mammosphere formation in SUM159 scrambled control cells, ARIH1 KD cells and ARIH1 KD cells with hnRNP E1 silencing. V5 hnRNP E1 protein levels in **(k)** SUM159 ARIH1 ORF cells 3 d post transient nucleofection, and **(l)** stably selected SUM159 cells. V5 hnRNP E1 protein levels in stably selected SUM159 cells treated with cycloheximide for **(m)** 0, 4 and 8 h and for **(n)** 0 and 17 h. Hsp90 is used as a loading control. **(o)** V5 hnRNP E1 protein levels in stably selected SUM159 cells transiently transfected with control or ARIH1 siRNA for 72 h. **(p)** Proliferation of SUM159 cells stably expressing WT, K314R and K351R V5 hnRNP E1, as assessed by cell count. **(q)** Representative images and quantitation of mammosphere number (Mean  $\pm$  SEM, paired t-test compared to control; \*\* =  $P < 0.01$ , \*\*\* =  $P < 0.001$ ). **(r)** Representative images of 2D invasion assay using SUM159 cells stably expressing WT, K314R and K351R V5 hnRNP E1.

**Figure S5. (a)** Kaplan-Meier analysis of survival in TCGA breast cancer patient data. (n = 1194, TCGA dataset;  $P=0.05$ , log-rank test). **(b)** Kaplan-Meier analysis of relapse-free survival in breast cancer patients. (n = 3951, KM-plotter;  $P<0.001$ , log-rank test). Correlation between ARIH1 protein levels and the epithelial markers **(c)** E-cadherin and **(d)** Occuldin in breast cancer patient samples analyzed using cBioPortal. **(e)** Protein expression of ARIH1 in normal lung and lung adenocarcinoma tissue. **(f)** Protein expression of ARIH1 across lung cancer grade.

**Figure S6. (a)** Protein levels of hnRNP E1 and ARIH1 across a panel of colorectal cancer cell lines. Hsp90 was used as a loading control (top panel). hnRNP E1 transcript levels are not altered across these lines, as assessed by semi-quantitative PCR. GAPDH was used as a loading control (bottom panel). **(b)** Representative images of HCT116 scrambled control and ARIH1 KD cell morphology. **(c)** Proliferation of HCT116 scrambled control and ARIH1 KD cells, as assessed by cell count across 4 days. **(d)** 3D invasion assay of HCT116 WT, scrambled control and ARIH1 KD cells; representative images of invasion in Cultrex. **(e)** Correlation between ARIH1 protein

levels and the mesenchymal marker Vimentin (left panel) and the epithelial marker E-Cadherin (right panel) in colorectal cancer patient samples analyzed using cBioPortal.

**Table S1.** Sequences and expected product size of primers used for PCR.

**Table S2.** List of proteins identified from ARIH1-miniTurboID experiment.

**Table S3.** Sanger sequencing results for hnRNP E1 CRISPR clones.

# Supplemental Figure 1

**a**

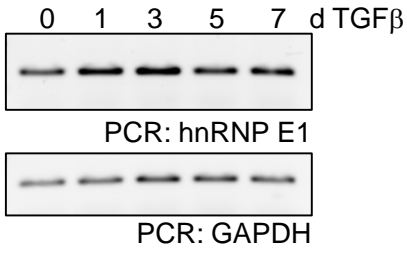

**b**

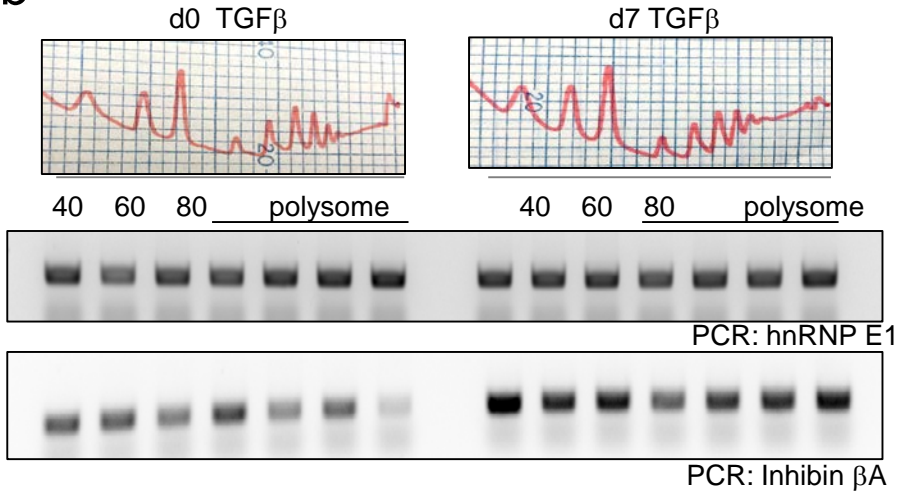

**c**

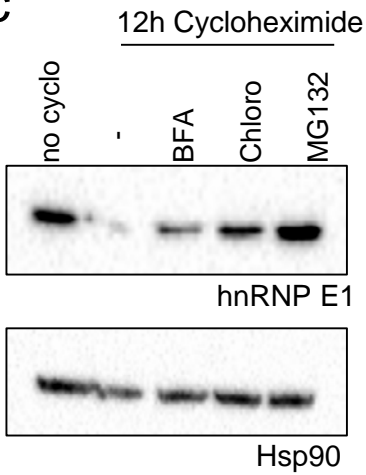

**d**

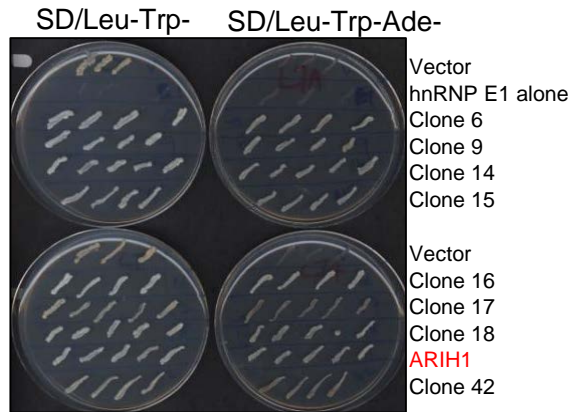

**e**

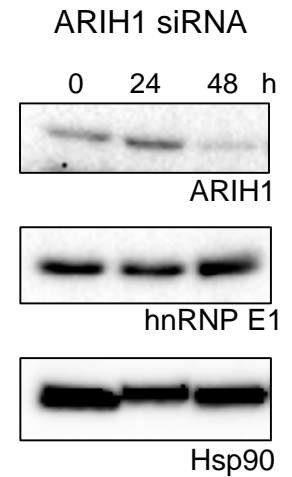

**f**

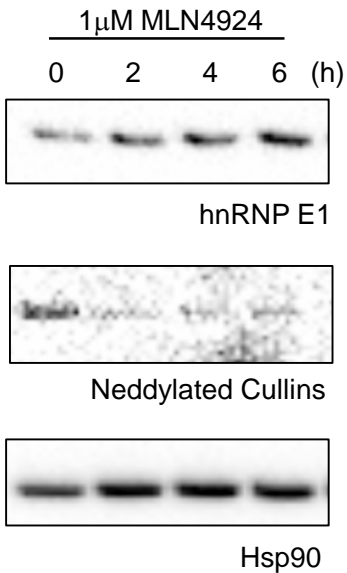

**g**

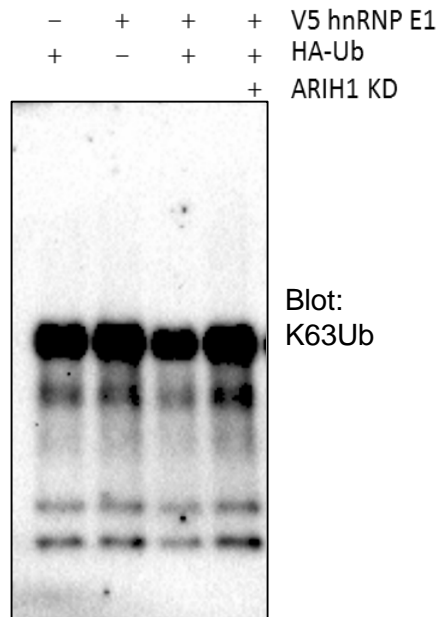

**h**

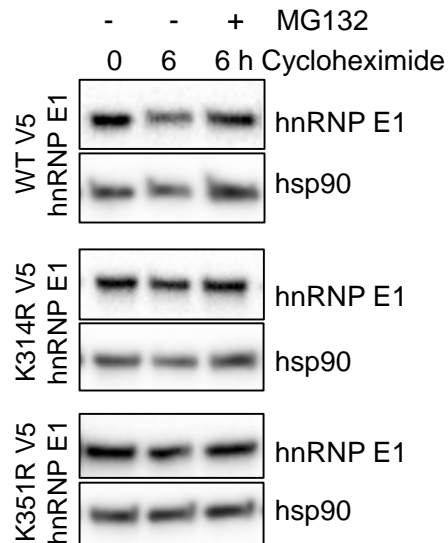

# Supplemental Figure 2

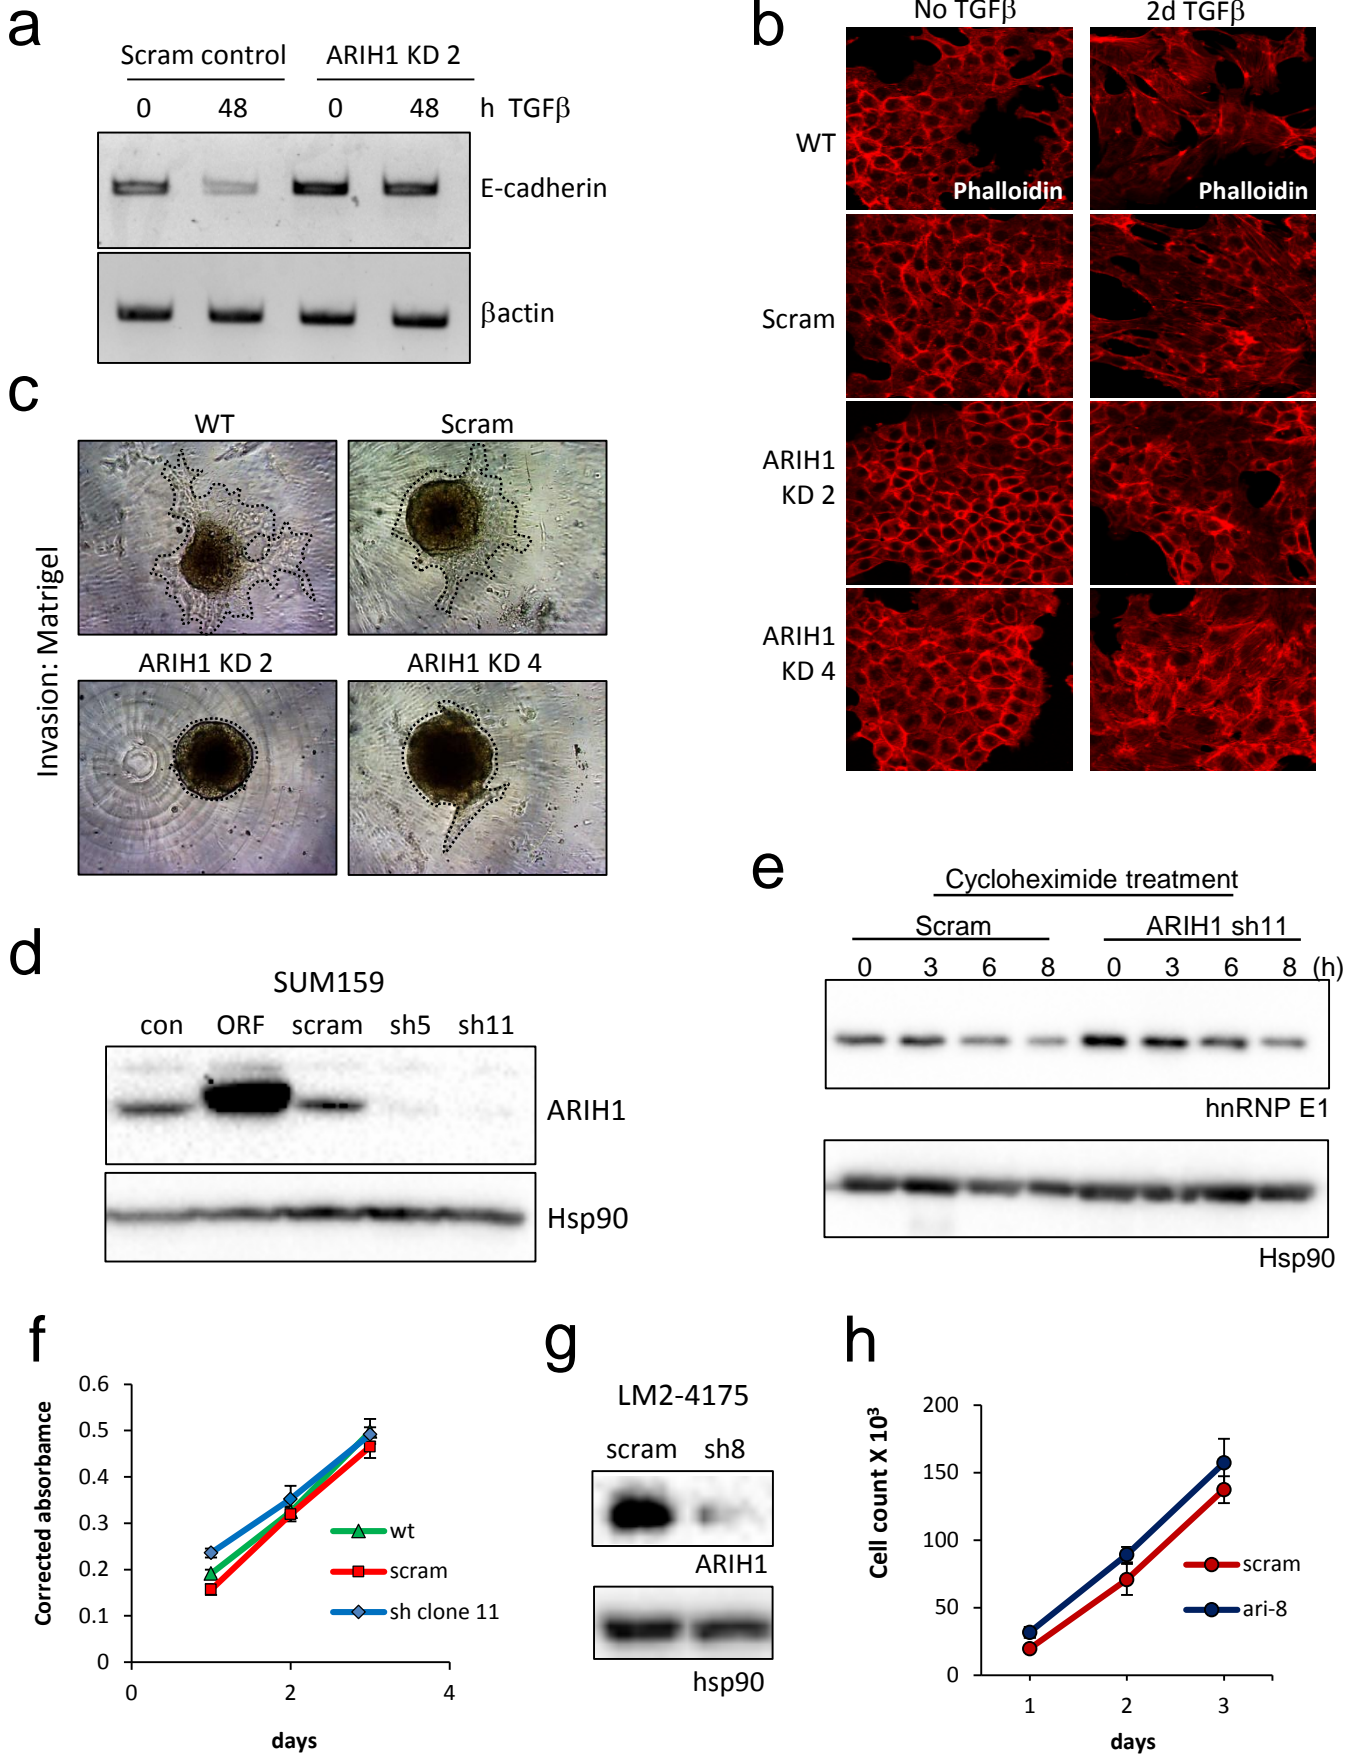

# Supplemental Figure 3

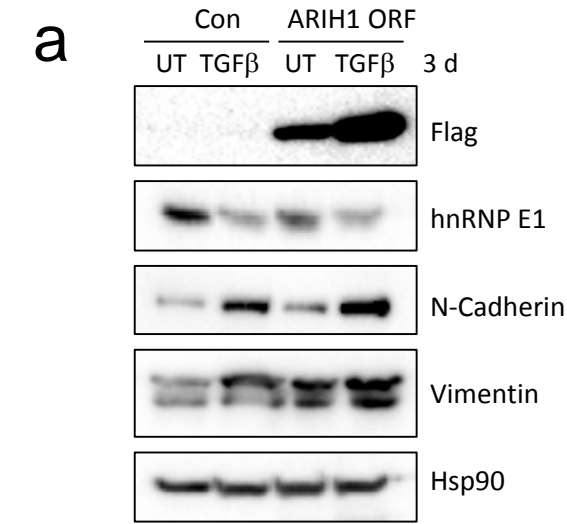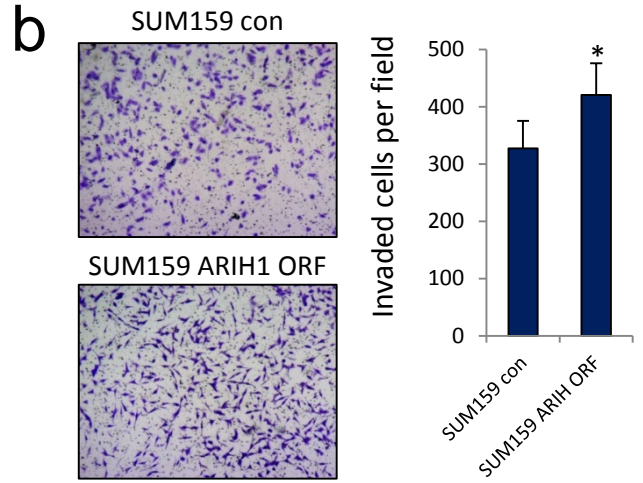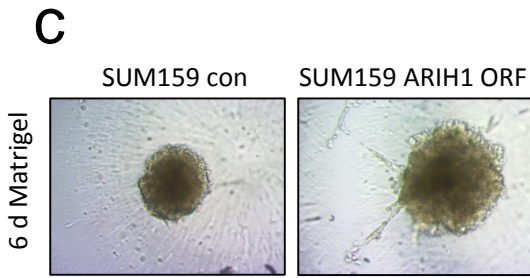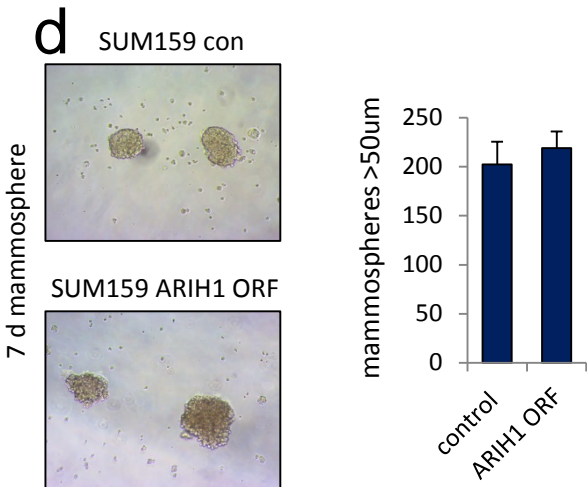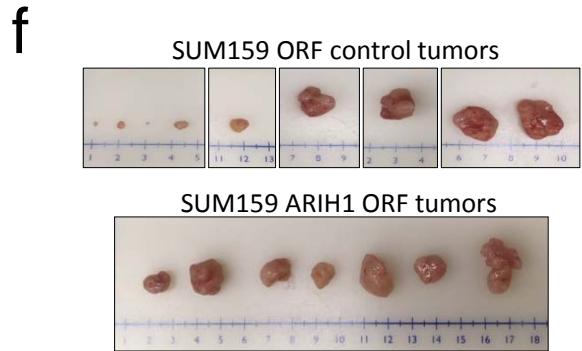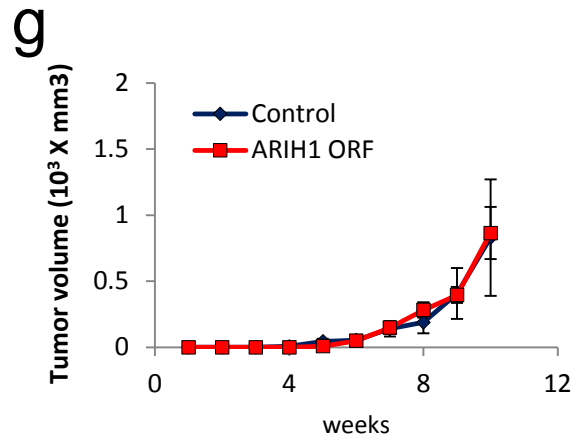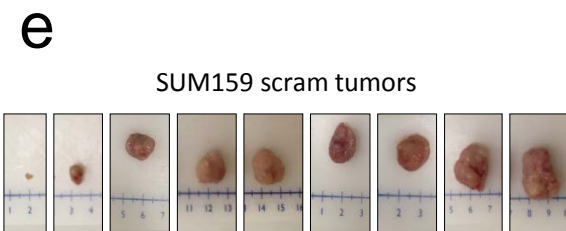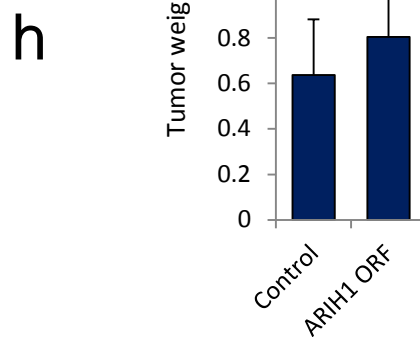

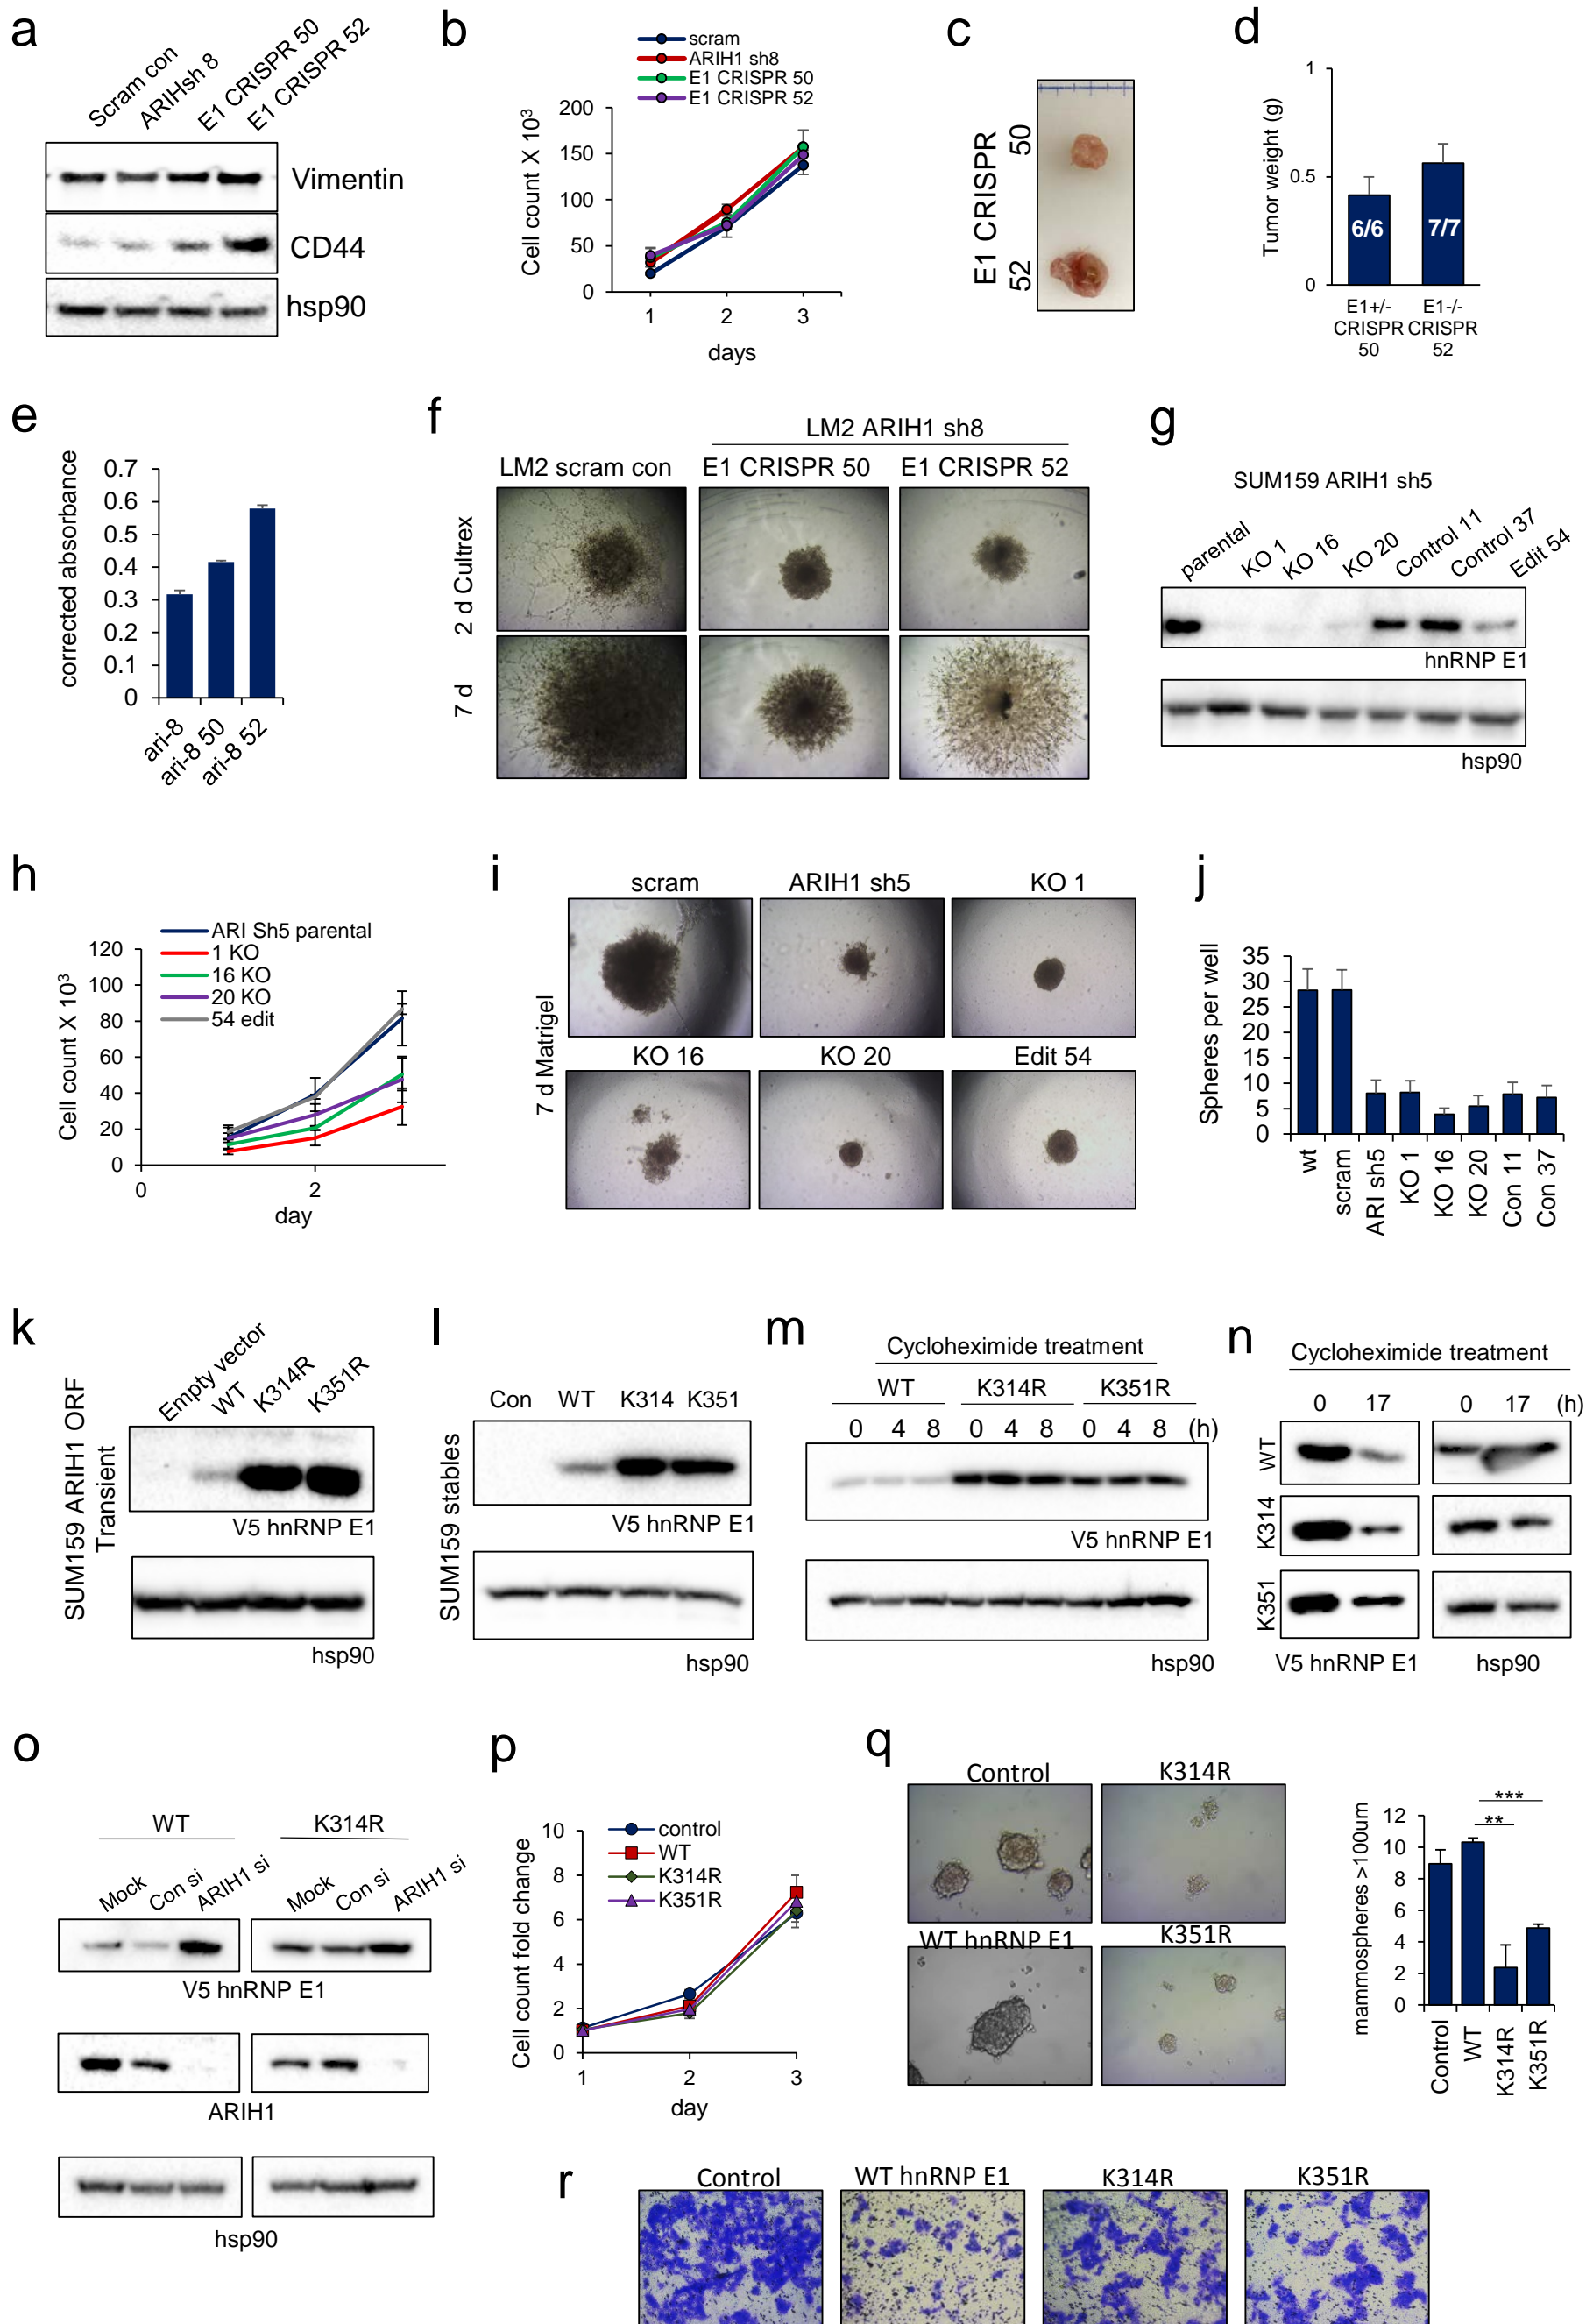





# Supplemental Figure 6

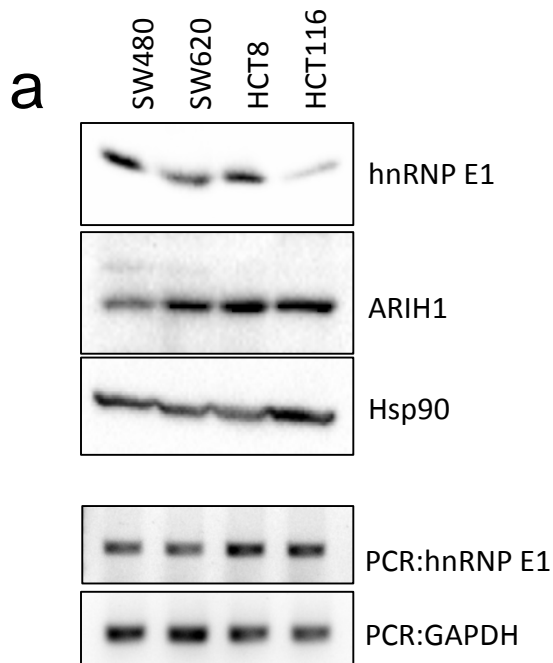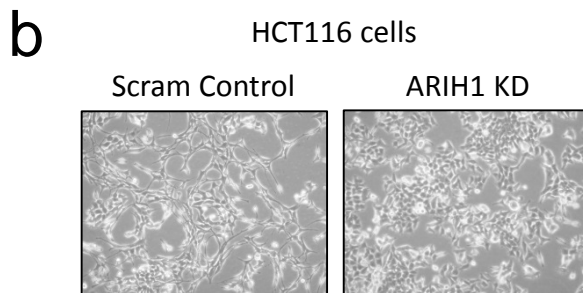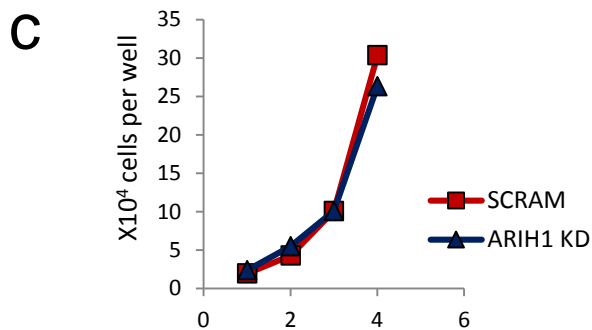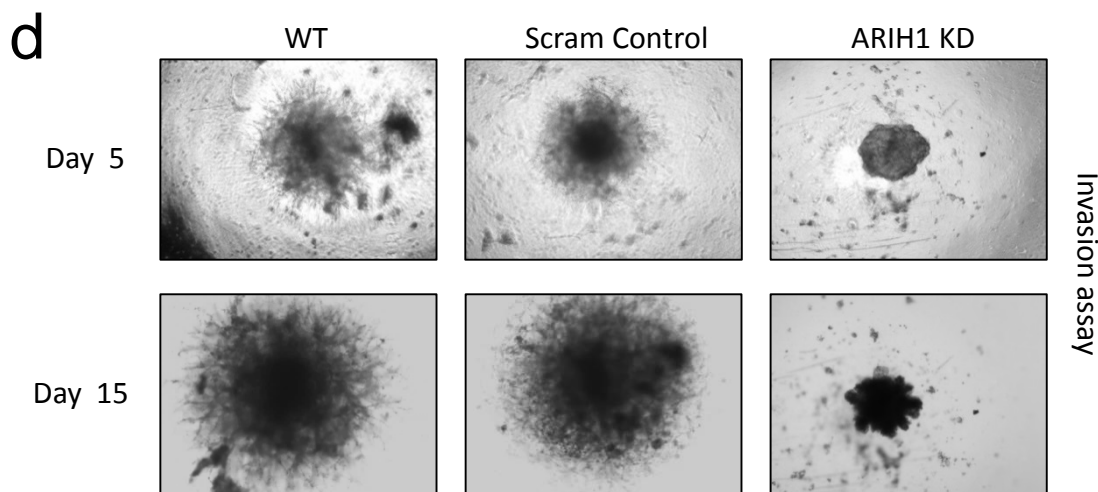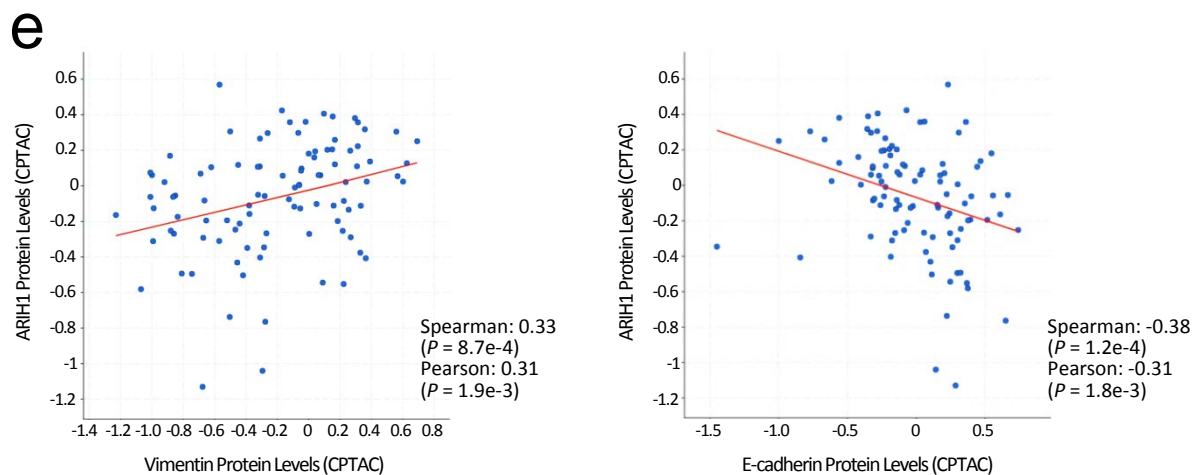

Table S1. Primers used for PCR

| Target                          | Sequence                                                                                    | Product size |
|---------------------------------|---------------------------------------------------------------------------------------------|--------------|
| Mouse hnRNP E1                  | Forward: AAGGCGCCAACATCAATGAG; Reverse: GGGTTACGAGCGAACCTACG                                | 204 bp       |
| Mouse ARIH1                     | Forward:GAGGTCATCCAGAATCCAGCA ; Reverse:TGCGCAGGACACGAAATAGT                                | 338 bp       |
| Mouse E-Cadherin                | Forward: GAAGGCTTGAGCACAAACAGC; Reverse: AGATGGGGGCTTCATTACCG                               | 400 bp       |
| Mouse Inhibin $\beta$ A         | Forward: TCCCCACCCAGGATCCGA; Reverse: ACCGGCTGGGTGACATCGGG                                  | 173 bp       |
| Mouse GAPDH                     | Forward: GGTTGTCTCCTGCGACTTCA; Reverse: TAGGGCTCTCTTGCTCAGT                                 | 220 bp       |
| Human hnRNP E1                  | Forward: CCACGTAACGAGCCCAACT; Reverse: CCCTCCGAGATGTTGATCCG                                 | 200 bp       |
| Human ARIH1                     | Forward: AGAGAATGCCACAGAGGTGC; Reverse: CCCTTCGTCGACTCTCACAG                                | 119 bp       |
| Human Aldh1a1                   | Forward: ATCAAAGAAGCTGCCGGGAA; Reverse: GCATTGTCCAAGTCGGCATC                                | 101 bp       |
| Human Klf4                      | Forward: ATGCTCACCCACCTTCTTC; Reverse: GGTGGTCCGACCTGGAAAAT                                 | 340 bp       |
| Human Oct4                      | Forward: CTCACCCTGGGGGTTCTATT; Reverse: CTGGTTCGCTTTCTCTTTTCG                               | 203 bp       |
| Human Sox2                      | Forward: AACCAGCGCATGGACAGTTA; Reverse: GACTTGACCACCGAACCCAT                                | 278 bp       |
| Human Nanog                     | Forward: AAAGGCAACAACCCACTTC; Reverse: CATTGCTATTCTTCGGCCAG                                 | 274 bp       |
| Human GAPDH                     | Forward: TGATGACATCAAGAAGGTGGTGAAG; Reverse: TCCTTGAGGCCATGTGGGCCAT                         | 240 bp       |
| $\beta$ -Actin                  | Forward: TCATGAAGTGTGACGTTGACATCCGT; Reverse: CCTAGAAGCATTTCGGGTGCACGATG                    | 285 bp       |
| miniturboid ARIH1               | Forward: GGTGGTAAGCTTATGGACTCGGACGAGGGCTACA;<br>Reverse: TGCTTAGCGGCCCGCTCCTCAATGTACTCCCACA | 1.6 kb       |
| hnRNP E1 CRISPR primer set A    | Forward: ACTTGACCACGTAACGAGCC; Reverse: TCCAGCATGACCAGGCAAAT                                | 554 bp       |
| hnRNP E1 CRISPR primer set B    | Forward: TCGGCTTCTTATGCACGGAA; Reverse: CTTCTCCAGCTTGTCGATGA                                | 197 bp       |
| K351 site directed mut. primers | Forward: CCCCATGCCCTCTCAGAGGAAAGCCTGGC;<br>Reverse: GCCAGGCTTCTCTGAGAGGGGCATGGGG            | n/a          |
| K314 site directed mut. primers | Forward: CTGGGTTGGCAATTCTGATCTGGGCCCCG;<br>Reverse: CGGGGCCAGATCAGAATTGCCAACCCAG            | n/a          |

Table S2. Proteins identified from ARIH1-miniTurboID experiment

| reference              | Gene Symbol | Annotation                                                                              | Unique hits:<br>Hek_ARIH1<br>mTbioID_Con | Total hits:<br>Hek_ARIH1<br>mTbioID_Con | Unique hits:<br>Hek_ARIH1<br>mTbioID_Biotin | Total hits:<br>Hek_ARIH1<br>mTbioID_Biotin |
|------------------------|-------------|-----------------------------------------------------------------------------------------|------------------------------------------|-----------------------------------------|---------------------------------------------|--------------------------------------------|
| sp P21333 FLNA_HUMAN   | FLNA        | Filamin-A OS=Homo sapiens GN=FLNA PE=1 SV=4                                             | 0                                        | 0                                       | 51                                          | 56                                         |
| sp P49327 FASN_HUMAN   | FASN        | Fatty acid synthase OS=Homo sapiens GN=FASN PE=1 SV=3                                   | 0                                        | 0                                       | 21                                          | 21                                         |
| sp P50990 TCPQ_HUMAN   | CCT8        | T-complex protein 1 subunit theta OS=Homo sapiens GN=CCT8 PE=1 SV=4                     | 0                                        | 0                                       | 16                                          | 16                                         |
| sp Q04637 IF4G1_HUMAN  | EIF4G1      | Eukaryotic translation initiation factor 4 gamma 1 OS=Homo sapiens GN=EIF4G1 PE=1 SV=4  | 0                                        | 0                                       | 9                                           | 10                                         |
| sp P11388 TOP2A_HUMAN  | TOP2A       | DNA topoisomerase 2-alpha OS=Homo sapiens GN=TOP2A PE=1 SV=3                            | 0                                        | 0                                       | 7                                           | 7                                          |
| sp Q99613 EIF3C_HUMAN  | EIF3C       | Eukaryotic translation initiation factor 3 subunit C OS=Homo sapiens GN=EIF3C PE=1 SV=1 | 0                                        | 0                                       | 7                                           | 7                                          |
| sp Q6WCQ1 MPRIP_HUMAN  | MPRIP       | Myosin phosphatase Rho-interacting protein OS=Homo sapiens GN=MPRIP PE=1 SV=3           | 0                                        | 0                                       | 7                                           | 7                                          |
| sp P46060 RAGP1_HUMAN  | RANGAP1     | Ran GTPase-activating protein 1 OS=Homo sapiens GN=RANGAP1 PE=1 SV=1                    | 0                                        | 0                                       | 7                                           | 7                                          |
| sp Q09666 AHNAK_HUMAN  | AHNAK       | Neuroblast differentiation-associated protein AHNAK OS=Homo sapiens GN=AHNAK PE=1 SV=2  | 0                                        | 0                                       | 7                                           | 7                                          |
| sp P27816 MAP4_HUMAN   | MAP4        | Microtubule-associated protein 4 OS=Homo sapiens GN=MAP4 PE=1 SV=3                      | 0                                        | 0                                       | 7                                           | 7                                          |
| sp P37802 TAGLN2_HUMAN | TAGLN2      | Transgelin-2 OS=Homo sapiens GN=TAGLN2 PE=1 SV=3                                        | 0                                        | 0                                       | 6                                           | 7                                          |
| sp P52907 CAZA1_HUMAN  | CAPZA1      | F-actin-capping protein subunit alpha-1 OS=Homo sapiens GN=CAPZA1 PE=1 SV=3             | 0                                        | 0                                       | 5                                           | 6                                          |
| sp Q9UM54 MYO6_HUMAN   | MYO6        | Unconventional myosin-VI OS=Homo sapiens GN=MYO6 PE=1 SV=4                              | 0                                        | 0                                       | 5                                           | 5                                          |
| sp Q86VP6 CAND1_HUMAN  | CAND1       | Cullin-associated NEDD8-dissociated protein 1 OS=Homo sapiens GN=CAND1 PE=1 SV=2        | 0                                        | 0                                       | 5                                           | 5                                          |
| sp Q9Y4X5 ARI1_HUMAN   | ARIH1       | E3 ubiquitin-protein ligase ARIH1 OS=Homo sapiens GN=ARIH1 PE=1 SV=2                    | 0                                        | 0                                       | 4                                           | 4                                          |
| sp Q14152 EIF3A_HUMAN  | EIF3A       | Eukaryotic translation initiation factor 3 subunit A OS=Homo sapiens GN=EIF3A PE=1 SV=1 | 0                                        | 0                                       | 4                                           | 4                                          |
| sp Q6Y7W6 GGYF2_HUMAN  | GIGYF2      | GRB10-interacting GYF protein 2 OS=Homo sapiens GN=GIGYF2 PE=1 SV=1                     | 0                                        | 0                                       | 4                                           | 4                                          |
| sp P40227 TCPZ_HUMAN   | CCT6A       | T-complex protein 1 subunit zeta OS=Homo sapiens GN=CCT6A PE=1 SV=3                     | 0                                        | 0                                       | 4                                           | 4                                          |
| sp Q9Y5K6 CD2AP_HUMAN  | CD2AP       | CD2-associated protein OS=Homo sapiens GN=CD2AP PE=1 SV=1                               | 0                                        | 0                                       | 4                                           | 4                                          |
| sp O75367 H2AFY_HUMAN  | H2AFY       | Core histone macro-H2A.1 OS=Homo sapiens GN=H2AFY PE=1 SV=4                             | 0                                        | 0                                       | 4                                           | 4                                          |
| sp P49368 TCPG_HUMAN   | CCT3        | T-complex protein 1 subunit gamma OS=Homo sapiens GN=CCT3 PE=1 SV=4                     | 0                                        | 0                                       | 4                                           | 4                                          |
| sp Q00341 VIGLN_HUMAN  | HDLBP       | Vigilin OS=Homo sapiens GN=HDLBP PE=1 SV=2                                              | 0                                        | 0                                       | 3                                           | 3                                          |
| sp Q9Y490 TLN1_HUMAN   | TLN1        | Talin-1 OS=Homo sapiens GN=TLN1 PE=1 SV=3                                               | 0                                        | 0                                       | 3                                           | 3                                          |
| sp Q9P0K7 RAI14_HUMAN  | RAI14       | Ankycorbin OS=Homo sapiens GN=RAI14 PE=1 SV=2                                           | 0                                        | 0                                       | 3                                           | 3                                          |
| sp O75821 EIF3G_HUMAN  | EIF3G       | Eukaryotic translation initiation factor 3 subunit G OS=Homo sapiens GN=EIF3G PE=1 SV=2 | 0                                        | 0                                       | 3                                           | 3                                          |
| sp P49411 EFTU_HUMAN   | TUFM        | Elongation factor Tu, mitochondrial OS=Homo sapiens GN=TUFM PE=1 SV=2                   | 0                                        | 0                                       | 3                                           | 3                                          |
| sp Q92900 RENT1_HUMAN  | UPF1        | Regulator of nonsense transcripts 1 OS=Homo sapiens GN=UPF1 PE=1 SV=2                   | 0                                        | 0                                       | 3                                           | 3                                          |
| sp Q58FF7 H90B3_HUMAN  | HSP90AB3P   | Putative heat shock protein HSP 90-beta-3 OS=Homo sapiens GN=HSP90AB3P PE=5 SV=1        | 0                                        | 0                                       | 3                                           | 3                                          |
| sp Q16512 PKN1_HUMAN   | PKN1        | Serine/threonine-protein kinase N1 OS=Homo sapiens GN=PKN1 PE=1 SV=2                    | 0                                        | 0                                       | 3                                           | 3                                          |
| sp P49959 MRE11_HUMAN  | MRE11       | Double-strand break repair protein MRE11 OS=Homo sapiens GN=MRE11 PE=1 SV=3             | 0                                        | 0                                       | 3                                           | 3                                          |
| sp Q15365 PCBP1_HUMAN  | PCBP1       | Poly(rC)-binding protein 1 OS=Homo sapiens GN=PCBP1 PE=1 SV=2                           | 0                                        | 0                                       | 2                                           | 3                                          |
| sp P52597 HNRPF_HUMAN  | HNRNPF      | Heterogeneous nuclear ribonucleoprotein F OS=Homo sapiens GN=HNRNPF PE=1 SV=3           | 0                                        | 0                                       | 2                                           | 3                                          |
| sp Q14157 UBP2L_HUMAN  | UBAP2L      | Ubiquitin-associated protein 2-like OS=Homo sapiens GN=UBAP2L PE=1 SV=2                 | 0                                        | 0                                       | 2                                           | 2                                          |
| sp P50914 RL14_HUMAN   | RPL14       | 60S ribosomal protein L14 OS=Homo sapiens GN=RPL14 PE=1 SV=4                            | 0                                        | 0                                       | 2                                           | 2                                          |
| sp O00303 EIF3F_HUMAN  | EIF3F       | Eukaryotic translation initiation factor 3 subunit F OS=Homo sapiens GN=EIF3F PE=1 SV=1 | 0                                        | 0                                       | 2                                           | 2                                          |
| sp P07814 SYEP_HUMAN   | EPRS        | Bifunctional glutamate/proline--tRNA ligase OS=Homo sapiens GN=EPRS PE=1 SV=5           | 0                                        | 0                                       | 2                                           | 2                                          |
| sp Q13765 NACA_HUMAN   | NACA        | Nascent polypeptide-associated complex subunit alpha OS=Homo sapiens GN=NACA PE=1 SV=1  | 0                                        | 0                                       | 2                                           | 2                                          |
| sp Q14247 SRC8_HUMAN   | CTTN        | Src substrate cortactin OS=Homo sapiens GN=CTTN PE=1 SV=2                               | 0                                        | 0                                       | 2                                           | 2                                          |
| sp Q15393 SF3B3_HUMAN  | SF3B3       | Splicing factor 3B subunit 3 OS=Homo sapiens GN=SF3B3 PE=1 SV=4                         | 0                                        | 0                                       | 2                                           | 2                                          |
| sp P60866 RS20_HUMAN   | RPS20       | 40S ribosomal protein S20 OS=Homo sapiens GN=RPS20 PE=1 SV=1                            | 0                                        | 0                                       | 2                                           | 2                                          |
| sp P31943 HNRH1_HUMAN  | HNRNPH1     | Heterogeneous nuclear ribonucleoprotein H OS=Homo sapiens GN=HNRNPH1 PE=1 SV=4          | 0                                        | 0                                       | 2                                           | 2                                          |
| sp P17661 DESM_HUMAN   | DES         | Desmin OS=Homo sapiens GN=DES PE=1 SV=3                                                 | 0                                        | 0                                       | 2                                           | 2                                          |
| sp P78527 PRKDC_HUMAN  | PRKDC       | DNA-dependent protein kinase catalytic subunit OS=Homo sapiens GN=PRKDC PE=1 SV=3       | 0                                        | 0                                       | 2                                           | 2                                          |
| sp P14868 SYDC_HUMAN   | DARS        | Aspartate--tRNA ligase, cytoplasmic OS=Homo sapiens GN=DARS PE=1 SV=2                   | 0                                        | 0                                       | 2                                           | 2                                          |
| sp P57737 CORO7_HUMAN  | CORO7       | Coronin-7 OS=Homo sapiens GN=CORO7 PE=1 SV=2                                            | 0                                        | 0                                       | 2                                           | 2                                          |
| sp P63173 RL38_HUMAN   | RPL38       | 60S ribosomal protein L38 OS=Homo sapiens GN=RPL38 PE=1 SV=2                            | 0                                        | 0                                       | 2                                           | 2                                          |
| sp P13010 XRCC5_HUMAN  | XRCC5       | X-ray repair cross-complementing protein 5 OS=Homo sapiens GN=XRCC5 PE=1 SV=3           | 0                                        | 0                                       | 2                                           | 2                                          |
| sp P63244 RACK1_HUMAN  | RACK1       | Receptor of activated protein C kinase 1 OS=Homo sapiens GN=RACK1 PE=1 SV=3             | 0                                        | 0                                       | 2                                           | 2                                          |
| sp Q15019 SEPT2_HUMAN  | SEPT2       | Septin-2 OS=Homo sapiens GN=SEPT2 PE=1 SV=1                                             | 0                                        | 0                                       | 2                                           | 2                                          |
| sp Q16555 DPYL2_HUMAN  | DPYSL2      | Dihydropyrimidinase-related protein 2 OS=Homo sapiens GN=DPYSL2 PE=1 SV=1               | 0                                        | 0                                       | 2                                           | 2                                          |
| sp P50991 TCPD_HUMAN   | CCT4        | T-complex protein 1 subunit delta OS=Homo sapiens GN=CCT4 PE=1 SV=4                     | 0                                        | 0                                       | 2                                           | 2                                          |
| sp O95347 SMC2_HUMAN   | SMC2        | Structural maintenance of chromosomes protein 2 OS=Homo sapiens GN=SMC2 PE=1 SV=2       | 0                                        | 0                                       | 2                                           | 2                                          |
| sp P78344 IF4G2_HUMAN  | EIF4G2      | Eukaryotic translation initiation factor 4 gamma 2 OS=Homo sapiens GN=EIF4G2 PE=1 SV=1  | 0                                        | 0                                       | 2                                           | 2                                          |
| sp Q9NQC7 CYLD_HUMAN   | CYLD        | Ubiquitin carboxyl-terminal hydrolase CYLD OS=Homo sapiens GN=CYLD PE=1 SV=1            | 0                                        | 0                                       | 2                                           | 2                                          |
| sp A6NNT2 CP096_HUMAN  | C16orf96    | Uncharacterized protein C16orf96 OS=Homo sapiens GN=C16orf96 PE=4 SV=3                  | 0                                        | 0                                       | 2                                           | 2                                          |
| sp Q07157 ZO1_HUMAN    | TJP1        | Tight junction protein ZO-1 OS=Homo sapiens GN=TJP1 PE=1 SV=3                           | 0                                        | 0                                       | 2                                           | 2                                          |
| sp P33176 KINH_HUMAN   | KIF5B       | Kinesin-1 heavy chain OS=Homo sapiens GN=KIF5B PE=1 SV=1                                | 0                                        | 0                                       | 2                                           | 2                                          |
| sp P62851 RS25_HUMAN   | RPS25       | 40S ribosomal protein S25 OS=Homo sapiens GN=RPS25 PE=1 SV=1                            | 0                                        | 0                                       | 2                                           | 2                                          |
| sp P11021 GRP78_HUMAN  | HSPA5       | 78 kDa glucose-regulated protein OS=Homo sapiens GN=HSPA5 PE=1 SV=2                     | 1                                        | 1                                       | 5                                           | 5                                          |
| sp P17987 TCPA_HUMAN   | TCP1        | T-complex protein 1 subunit alpha OS=Homo sapiens GN=TCP1 PE=1 SV=1                     | 1                                        | 1                                       | 5                                           | 5                                          |
| sp P62701 RS4X_HUMAN   | RPS4X       | 40S ribosomal protein S4, X isoform OS=Homo sapiens GN=RPS4X PE=1 SV=2                  | 1                                        | 1                                       | 4                                           | 5                                          |
| sp P54652 HSP72_HUMAN  | HSPA2       | Heat shock-related 70 kDa protein 2 OS=Homo sapiens GN=HSPA2 PE=1 SV=1                  | 1                                        | 1                                       | 4                                           | 4                                          |
| sp Q14240 IF4A2_HUMAN  | EIF4A2      | Eukaryotic translation initiation factor 4A-II OS=Homo sapiens GN=EIF4A2 PE=1 SV=2      | 1                                        | 1                                       | 4                                           | 4                                          |
| sp O94832 MYO1D_HUMAN  | MYO1D       | Unconventional myosin-IId OS=Homo sapiens GN=MYO1D PE=1 SV=2                            | 1                                        | 1                                       | 4                                           | 4                                          |
| sp P13639 EF2_HUMAN    | EEF2        | Elongation factor 2 OS=Homo sapiens GN=EEF2 PE=1 SV=4                                   | 1                                        | 1                                       | 3                                           | 4                                          |
| sp P16403 H12_HUMAN    | HIST1H1C    | Histone H1.2 OS=Homo sapiens GN=HIST1H1C PE=1 SV=2                                      | 1                                        | 1                                       | 3                                           | 3                                          |
| sp P06576 ATPB_HUMAN   | ATP5B       | ATP synthase subunit beta, mitochondrial OS=Homo sapiens GN=ATP5B PE=1 SV=3             | 1                                        | 1                                       | 3                                           | 3                                          |
| sp P26373 RL13_HUMAN   | RPL13       | 60S ribosomal protein L13 OS=Homo sapiens GN=RPL13 PE=1 SV=4                            | 2                                        | 2                                       | 6                                           | 6                                          |
| sp P17844 DDX5_HUMAN   | DDX5        | Probable ATP-dependent RNA helicase DDX5 OS=Homo sapiens GN=DDX5 PE=1 SV=1              | 2                                        | 2                                       | 4                                           | 5                                          |
| sp P34931 HS71L_HUMAN  | HSPA1L      | Heat shock 70 kDa protein 1-like OS=Homo sapiens GN=HSPA1L PE=1 SV=2                    | 3                                        | 3                                       | 9                                           | 10                                         |
| sp P0DMV9 HS71B_HUMAN  | HSPA1B      | Heat shock 70 kDa protein 1B OS=Homo sapiens GN=HSPA1B PE=1 SV=1                        | 3                                        | 3                                       | 8                                           | 8                                          |
| sp P19338 NUCL_HUMAN   | NCL         | Nucleolin OS=Homo sapiens GN=NCL PE=1 SV=3                                              | 3                                        | 3                                       | 7                                           | 7                                          |
| sp P09874 PARP1_HUMAN  | PARP1       | Poly [ADP-ribose] polymerase 1 OS=Homo sapiens GN=PARP1 PE=1 SV=4                       | 4                                        | 4                                       | 13                                          | 13                                         |
| sp P52272 HNRPM_HUMAN  | HNRNPM      | Heterogeneous nuclear ribonucleoprotein M OS=Homo sapiens GN=HNRNPM PE=1 SV=3           | 4                                        | 4                                       | 10                                          | 10                                         |

Table S3. Sanger sequencing of hnRNP E1 CRISPR clones

| Legend: Guide RNA, Ref = ARIH1 KD parental sequencing results.         |                                                                                                      |
|------------------------------------------------------------------------|------------------------------------------------------------------------------------------------------|
| <b>LM2-4175 ARIH1 sh8 hnRNP E1 CRISPR clone 50 product (550 bp)</b>    |                                                                                                      |
| Ref                                                                    | TCGCGGATCTCTTTGATCTTACACCCGCCTTTCCCAATCAGGGAGCCGCACTGGGTGGCCGGCACCACCAGCCTCAGGGTGACCGGGGGCCTGCTGGCCG |
| Seq 1                                                                  | TCGCGGATCTCTTTGATCTTACACCCGCCTTTCCCAATCAGGGAGCCGCACTGGGTGGCCGGCACCACCAGCCTCAGGGTGACCGGGGGCCTGCTGGCCG |
| Seq 2                                                                  | TCGCGGATCTCTTTGATCTTACACCCGCCTTTCCCAATCAGGGAGCCGCACTGGGTGGCCGGCACCACCAGCCTCAGGGTGACCGGGGGCCTGCTGGCCG |
| Ref                                                                    | CGGTACTGTTGGTCATGGAGCTGTTGATATCTTCCCTCCAGCTTGTGATGATCATAGCGAAAGCCTTAAAGATGGCATTGGTGGGGCCGGTCAGAGTGAT |
| Seq 1                                                                  | CGGTACTGTTGGTCATGGAGCTGTTGATATCTTCCCTCCAGCTTGTGATGATCATAGCGAAAGCCTTAAAGATGGCATTGGTGGGGCCGGTCAGAGTGAT |
| Seq 2                                                                  | CGGTACTGTTGGTCATGGAGCTGTTGATATCTTCCCTCCAGCTTGTGATGATCATAGCGAAAGCCTTAAAGATGGCATTGGTGGGGCCGGTCAGAGTGAT |
| Ref                                                                    | GATTCTCTCCGGACAATCCCCCTCCGAGATGTTGATCCGCGGCCACTCTCCTCGGGATCCTCTTAACCGACTCCCCTTTCTTCCCAATGATGCTTCTC   |
| Seq 1                                                                  | GATTCTCTCCGGACAATCCCCCTCCGAGATGTTGATCCGCGGCCACTCTCCTCGGGATCCTCTTAACCGACTCCCCTTTCTTCCCAATGATGCTTCTC   |
| Seq 2                                                                  | GATTCTCTCCGGACAATCCCCCTCCGAGATGTTGATCCGCGGCCACTCTCCTCGGGATCCTCTTAACCGACTCCCCTTTCTTCCCAATGATGCTTCTC   |
| Ref                                                                    | ACTTCCTTTCCGTGCATAAGAAGCCGAATGGTGAGAGTCACATTTAGTCCAC-TTTCAGTCACACCGGCATCCATGGCGAGCGGGCGGGCGCTTCGGGG  |
| Seq 1                                                                  | ACTTCCTTTCCGTGCATAAGAAGCCGAATGGTGAGAGTCACATTTAGTCCAC-TTTCAGTCACACCGGCATCCATGGCGAGCGGGCGGGCGCTTCGGGG  |
| Seq 2                                                                  | ACTTCCTTTCCGTGCATAAGAAGCCGAATGGTGAGAGTCACATTTAGTCCAC-TTTCAGTCACACCGGCATCCATGGCGAGCGGGCGGGCGCTTCGGGG  |
| <b>LM2-4175 ARIH1 sh8 hnRNP E1 CRISPR clone 52 product A (550 bp)</b>  |                                                                                                      |
| Ref                                                                    | TCGCGGATCTCTTTGATCTTACACCCGCCTTTCCCAATCAGGGAGCCGCACTGGGTGGCCGGCACCACCAGCCTCAGGGTGACCGGGGGCCTGCTGGCCG |
| Seq 1                                                                  | TCGCGGATCTCTTTGATCTTACACCCGCCTTTCCCAATCAGGGAGCCGCACTGGGTGGCCGGCACCACCAGCCTCAGGGTGACCGGGGGCCTGCTGGCCG |
| Seq 2                                                                  | TCGCGGATCTCTTTGATCTTACACCCGCCTTTCCCAATCAGGGAGCCGCACTGGGTGGCCGGCACCACCAGCCTCAGGGTGACCGGGGGCCTGCTGGCCG |
| Seq 3                                                                  | TCGCGGATCTCTTTGATCTTACACCCGCCTTTCCCAATCAGGGAGCCGCACTGGGTGGCCGGCACCACCAGCCTCAGGGTGACCGGGGGCCTGCTGGCCG |
| Ref                                                                    | CGGTACTGTTGGTCATGGAGCTGTTGATATCTTCC-----TC---CAGCTTGTGATGATC-----ATAGCGAAAGCCTTAAAGATGG---CA         |
| Seq 1                                                                  | CGGTGAAGTGGTGATAGAAC-----CTTCCGA---T-----TTGTCCATCATC-----TTTGCGAATGACTTAAAGAAAG---CC                |
| Seq 2                                                                  | CGGTGGCGGTGGTCAT-----TGA-ATCCTGCGAATTTGCCCTCATCTTGGCGAA-----AGACCTAA---CGAAAGCCTTG---AAGGGGACCG      |
| Seq 3                                                                  | CGGTGCTTCTGGGTATG-----TG-----TGCG---GTCA-TCATCTTGTGCGAGCTCGCCGAGAT-TAATAGCAAAACACTAGAAAATGGAA---     |
| Ref                                                                    | TTGGTGGGGC-CGGTCA---GAGTGATG---ATTCTCTCC--GGACAATCCCCCTCCG--AGATGTTGATCCGCGCCCACTCTCCTCGGGATCCTCT    |
| Seq 1                                                                  | TTGAAGGGGA-CGGTTG---GAGGGCG---GTTCTAACC--GAAAATTTCCCG--CGAAAATGCCATCCGAAAGGTACTCCCTCCCGATCCTCT       |
| Seq 2                                                                  | TTGGAGGGG--CGGT---TCTAAGGGTG--ATTTCC--CCCTGGAAAATTTCCCTCCGAAAGCTT-----ATCCCTCCCGATCCTCT              |
| Seq 3                                                                  | -TGGGGGGATCAGTCACTTA-----TGCAATCTCTCGCC---AAATCTGTTC--ACGCTTCGGATTTCCCGCAACTCTCTCGCAATTTCTC          |
| Ref                                                                    | TAACCGACTCCCCTTTCTTCCCAATGATGCTTCC--TACTTCTTTCCGTGCAT-----AAGAGCCGAATG---GTGAGA-----G---T---         |
| Seq 1                                                                  | TAACGGACCCCTTATCTTCCCGCCCTTGTCTCC--TACTGACGTTCCCTACTT-----CCTAACCCGAATG---AAGAGA--CCAACGG---TTAA     |
| Seq 2                                                                  | TACCGGACCCCTTAAACACCCCTTTGCTTCCA--ATTCTTTCTTGTCTC-----TTAACCCGAATG---AAGAGACCCATTG---TTAA            |
| Seq 3                                                                  | TTCCGGA-----TT-----CCCAGTCTCCAATGATGC-----CTTCGACTATAATTACCCGATTGTAAAGTGA---AATGGGGATTAA             |
| Ref                                                                    | -----CACATTTAGTCCACTTTCAGTCACACCGGCATCCATGGCGAGCGGGCGG                                               |
| Seq 1                                                                  | AA-CACTCTTTACTCCACTT-----CATCCCGCGCACCAGCGGG                                                         |
| Seq 2                                                                  | AAGCCCTTTTAA-TCCACTTCT--CCA-----C-----GGCTCCAGCGGG                                                   |
| Seq 3                                                                  | AAC-----A-TCGACA-CCTGTGACATTGGTA----GGCGT-----GGG                                                    |
| <b>LM2-4175 ARIH1 sh8 hnRNP E1 CRISPR clone 52 product B (~300 bp)</b> |                                                                                                      |
| Ref                                                                    | TCGCGGATCTCTTTGATCTTACACCCGCCTTTCCCAATCAGGGAGCCGCACTGGGTGGCCGGCACCACCAGCCTCAGGGTGACCGGGGGCCTGCTGGCCG |
| Seq1                                                                   | TCGCGGATCTCTTTGATCTTACACCCGCCTTTCCCAATCAGGGAGCCGCACTGGGTGGCCGGCACCACCAGCCTCAGGGTGACCGGGGGCCTGCTGGCCG |
| Ref                                                                    | CGGTACTGTTGGTCATGGAGCTGTTGATATCTTCCCTCCAGCTTGTGATGATCATAGCGAAAGCCTTAAAGATGGCATTGGTGGGGCCGGTCAGAGTGAT |
| Seq1                                                                   | CGGT-----                                                                                            |
| Ref                                                                    | GATTCTCTCCGGACAATCCCCCTCCGAGATGTTGATCCGCGGCCACTCTCCTCGGGATCCTCTTAACCGACTCCCCTTTCTTCCCAATGATGCTTCTC   |
| Seq1                                                                   | -----                                                                                                |
| Ref                                                                    | ACTTCCTTTCCGTGCATAAGAAGCCGAATGGTGAGAGTCACATTTAGTCCACTTTCAGTCACACCGGCATCCATGGCGAGC                    |
| Seq1                                                                   | -----CAGTCACACCGGCATCCATGGCGAGC                                                                      |
| <b>SUM159 ARIH1 sh5 hnRNP E1 CRISPR clone 1 product A (550 bp)</b>     |                                                                                                      |
| Ref                                                                    | TCGCGGATCTCTTTGATCTTACACCCGCCTTTCCCAATCAGGGAGCCGCACTGGGTGGCCGGCACCACCAGCCTCAGGGTGACCGGGGGCCTGCTGGCCG |
| Seq1                                                                   | TCGCGGATCTCTTTGATCTTACACCCGCCTTTCCCAATCAGGGAGCCGCACTGGGTGGCCGGCACCACCAGCCTCAGGGTGACCGGGGGCCTGCTGGCCG |
| Seq2                                                                   | TCGCGGATCTCTTTGATCTTACACCCGCCTTTCCCAATCAGGGAGCCGCACTGGGTGGCCGGCACCACCAGCCTCAGGGTGACCGGGGGCCTGCTGGCCG |
| Ref                                                                    | CGGTACTGTTGGTCATGGAGCTGTTGATATCTTCCCTCCAGCTTGTGATGATCATAG-CGAAAGCCTTAAAGATGGCATTGGTGGGGCCGGTCAGAGTGA |
| Seq1                                                                   | CGGTACTGTTGGTCATGGAGCTGTTGATATCTTCCCTCCAGCTTGTGATGATCATAG-CGAAAGCCTTAAAGATGGCATTGGTGGGGCCGGTCAGAGTGA |
| Seq2                                                                   | CGGCCTTGTGGCCAGCGTCCGGCGAAATGGTGGGGCGGCTTGTGGGTACTCATAGCCGTAA-CCTGAAAGATGACATTGGTGGGGCCGGTCAGAGTGA   |
| Ref                                                                    | TGATTCTCTCCGGACAATCCCCCTCCGAGATGTTGATCCGCGGCCACTCTCCTCGGGATCCTCTTAACCGACTCCCCTTTCTTCCCAATGATGCTTCC   |
| Seq1                                                                   | TGATTCTCTCCGGACAATCCCCCTCCGAGATGTTGATCCGCGGCCACTCTCCTCGGGATCCTCTTAACCGACTCCCCTTTCTTCCCAATGATGCTTCC   |
| Seq2                                                                   | TGATTCTCTCCGGACAATCCCCCTCCGAGATGTTGATCCGCGGCCACTCTCCTCGGGATCCTCTTAACCGACTCCCCTTTCTTCCCAATGATGCTTCC   |

Ref TACTTCCTTTCCGTGCATAAGAAGCCGAATGGTGAGAGTACATTTAGTC-CAC**TTTCAGTCAACCCGGCATC**CATGGCGAGCGGGCGGC-GG  
Seq1 TACTTCCTTTCCGTGCATAAGAAGCCGAATGGTGAGAGTACATTTAGTC-CACTT-----GGCATCCCTGCCGCGCGGGCGGG  
Seq2 TACTTCCTTTCCGTGCATAAGAAGCCGAATGGTGAGAGTACATTTAGTACACC---GTCACACAGGGATACATGGCGAGCGCTTGCGGG

**SUM159 ARIH1 sh5 hnRNP E1 CRISPR clone 1 product B (~300 bp)**

Ref **CGGTACTGTTGGTCATGGAG**CTGTTGATATCTTCTCCAGCTTGTGCGATGATCATAGCGAAAGCCTTAAAGATGGCATTGGTGGGGCCGGTCCAGAGTGAT  
Seq1 CGGTA-----AGT---  
Seq2 CTG-----CCTCCA-----

Ref GATTCCTCCGGACAATCCCTCCGAGATGTTGATCCGCGGCCACTCTCCTCGCGGATCCTCTTAACCGACTCCCTTTCTTCCCAATGATGCTTCCT  
Seq1 -----CTCGC-----  
Seq2 -----

Ref ACTTCCTTTCCGTGCATAAGAAGCCGAATGGTGAGAGTACATTTAGTCCAC**TTTCAGTCAACCCGGCATC**CATGGCGAGCGGGCGGGCGGCTTCGGGGG  
Ref -----CAGCGGC---CATGG-----GCGGTCCGCGGG  
Seq2 -----ACACGGGCATCGATGGCGATCGGGGGGAGCGGGCGGGG

Ref AGTTGGGCTCGTTA  
Seq1 CGTGTCTTCGTTA  
Seq2 ACGTGGGCTCGTTA

**SUM159 ARIH1 sh5 hnRNP E1 CRISPR clone 16 product A (550 bp)**

Ref TCGCGGATCTCTTTGATCTTACACCCGCCTTTCCCAATCAGGGAGCCGCACTGGGTGGCCGGCACCACCAGCCTCAGGGTGACCGGGGGCTGCTGGCCG  
Seq1 TCGCGGATCTCTTTGATCTTACACCCGCCTTTCCCAATCAGGGAGCCGCACTGGGTGGCCGGCACCACCAGCCTCAGGGTGACCGGGGGCTGCTGGCCG  
Seq2 TCGCGGATCTCTTTGATCTTACACCCGCCTTTCCCAATCAGGGAGCCGCACTGGGTGGCCGGCACCACCAGCCTCAGGGTGACCGGGGGCTGCTGGCCG

Ref **CGGTACTGTTGGTCATGGAG**CTGTTGATATCTTCTCCAGCTTGTGCGATGATCATAGCGAAAGCCTTAAAGATGGCATTGGTGGGGCC---GGTCAGAGT  
Seq1 CGGTACTGTTGGTCATGGAGCTGTTGATATCTTCTCCAGCTTGTGCGATGATCATAGCGAAAGCCTTAAAGATGGCATTGGTGGGGCC---GGTCAGAGT  
Seq2 CGGT-----GGAGCTGGTGTATTTGTCCAAATGTCGACGACTCTGGCGAAAATCTTAAAGAAGGCATTGGAGAGGACATTGGT---AGG

Ref GATGATTCTCTCCGGACA--ATTCCCCTCCGAGATGTTGATCCGCGGCCACTCTCCTCGCGGATCCTCTTAACCGACTCCCTTTCT--TCCCAATGAT  
Seq1 GATGATTCTCTCCGGACA--ATTCCCCTCCGAGATGTTGATCCGCGGCCACTCTCCTCGCGGATCCTCTTAACCGACTCCCTTTCT--TCCCAATGAT  
Seq2 GATGATTCTATC--GATAATATTCTCTGACAAATGCTGATCCACACGCGGATCTCCTCGCGGATCCTCTTAACGAACCTCCCTTTCTACTCCCT--AT

Ref GCTTCCTACTTCTTTCCGTGCATAAGAAGCCGAATGGTGAGAGTACATTTAGTC-CAC**TTTCAGTCAACCCGGCATC**CATGGCGAGCGGGCGGGCGGG  
Seq1 GCTTCCTACTTCTTTCCGTGCATAAGAAGCCGAATGGTGAGAGTACATTTAGTC-CAC-----CGGCATCCATGGCGAGCGGGCGGGCGGG  
Seq2 CTTTCCTACTATGTTTCTTAGTATCTTAAACCGAATGGTAAGACTAACGTTGAGACTCATTTTACTC-CACCGCATCCATGGCAAGCGGGCGGGCGGG

**SUM159 ARIH1 sh5 hnRNP E1 CRISPR clone 16 product B (~300 bp)**

Ref GTACTCTCGC-GGATCTCTTTGATCTTACACCCGCCTTTCCCAATCAGGGAGCCGCACTGGGTGGCCGGCACCACCAGCCTCAGGGTGACCGGGGGCTG  
Seq1 GTACTCTCGCGGGATCTCTTTGATCTTACACCCGCCTTTCCCAATCAGGGAGCCGCACTGGGTGGCCGGCACCACCAGCCTCAGGGTGACCGGGGGCTG  
Seq2 GTACAGTCGCGTCATCTCTTTGATCTTACACCCGCCTTTCCCAATCAGGGAGTCCGCACTGGGTGGCCGGCACCACCAGCCTCAGGGTGACCGGGGGCTG

Ref CTGGCCG**CGGTACTGTTGGTCATGGAG**CTGTTGATATCTTCTCCAGCTTGTGCGATGATCATAGCGAAAGCCTTAAAGATGGCATTGGTGGGGCCGGTCA  
Seq1 ATGGCCGG-----ACCTGT-----  
Seq2 CTGGTCGCTGT-----

Ref GAGTGATGATTCTCTCCGGACAATCCCTCCGAGATGTTGATCCGCGGCCACTCTCCTCGCGGATCCTCTTAACCGACTCCCTTTCTTCCCAATGAT  
Seq1 -----  
Seq2 -----

Ref GCTTCCTACTTCTTTCCGTGCATAAGAAGCCGAATGGTGAGAGTACATTTAGTCCAC**TTTCAGTCAACCCGGCATC**CATGGCGAGCGGGCGGGCGGCT  
Seq1 -----CACACCAGCATCCATGGCGAGCGGGCGGGCGGCT  
Seq2 -----CAGGCACACCAGCATCCATGGCGAGCGGGCGGGCGGCT

Ref TCGGGGGAGTTGGGCTCGTTACGGG  
Seq1 TCGGGGGAGTTGGGCTCGTTACGTGG  
Seq2 TCGGGGGAGTTGGGCTCGTTACGTGG

**SUM159 ARIH1 sh5 hnRNP E1 CRISPR clone 20 product A (550 bp)**

Ref **CGGT-ACTGTTGGTCATG**---GAGCTGTTGATATCTTCTCCAGCTTGTGCGATGATCATAGCGAAAGCCTTAAAGATGGCATTGGTGGGGCCGGTCCAGAGT  
Seq1 CGGT-ACTGTTGGTCATG---GAGCTGTTGATATCTTCTCCAGCTTGTGCGATGATCATAGCGAAAGCCTTAAAGATGGCATTGGTGGGGCCGGTCCAGAGT  
Seq2 GTGTGACCGGCATCCATGGCGAGCGGAGGG---CGGCTTACGCTTGTCTATGATCATAGCGAAAGCCTTAAAGATGGCATTGGTGGGGCCGGTCCAGAGT

Ref GATGATTCTCTCCGGACAATCCCTCCGAGATGTTGATCCGCGGCCACTCTCCTCGCGGATCCTCTTAACCGACTCCCTTTCTTCCCAATGATGCTT  
Seq1 GATGATTCTCTCCGGACAATCCCTCCGAGATGTTGATCCGCGGCCACTCTCCTCGCGGATCCTCTTAACCGACTCCCTTTCTTCCCAATGATGCTT  
Seq2 GATGATTCTCTCCGGACAATCCCTCCGAGATGTTGATCCGCGGCCACTCTCCTCGCGGATCCTCTTAACCGACTCCCTTTCTTCCCAATGATGCTT

Ref CCTACTTCTTTCCGTGCATAAGAAGCCGAATGGTGAGAGTACATTTAGTCCAC**TTTCAGTCAACCCGGCATC**CATGGCG  
Seq1 CCTACTTCTTTCCGTGCATAAGAAGCCGAATGGTGAGAGTACATTTAGTCCACTTTCAGTCAACCCGGCATCCATGGCG

Seq2 CCTACTTCCTTTCCGTGCATAAGAAGCCGAATGGTGAGAGTCACATT-----CAGTCACACCGGCATCCATGGCG

**SUM159 ARIH1 sh5 hnRNP E1 CRISPR clone 20 product B (~300 bp)**

Ref TCGCGGATCTCTTTGATCTTACACCCGCCTTTCCCAATCAGGGAGCCGCACTGGGTGGCCGGCACCACCAGCCTCAGGGTGACCGGGGGCTGCTGGCCG  
Seq1 TCGCGGATCTCTTTGATCTTACACCCGCCTTTCCCAATCAGGGAGCCGCACTGGGTGGCCGGCACCACCAGCCTCAGGGTGACCGGGGGCTGCTGGCCG  
Seq2 TCGCGGATCTCTTTGATCTTACACCCGCCTTTCCCAATCAGGGAGCCGCACTGGGTGGCCGGCACCACCAGCCTCAGGGTGACCGGGGGCTGATGGTGC

Ref CGGTACTGTTGGTCATGGAGCTGTTGATATCTTCCCTCCAGCTTGTGCGATGATCATAGCGAAAGCCTTAAAGATGGCATTGGTGGGGCCGGTCAGAGTGAT  
Seq1 -----GTGTGA-  
Seq2 -----

Ref GATTCTCTCCGGACAATTCCCTCCGAGATGTTGATCCGCGGCCACTCTCCTCGCGGATCCTCTTAACCGACTCCCCTTCTTCCCAATGATGCTTCCT  
Seq1 -----  
Seq2 -----

Ref ACTTCCTTTCCGTGCATAAGAAGCCGAATGGTGAGAGTCACATTTAGTCCA**CTTTCAGTCACACCGGCAT**CCATGGCGAGCGCGGGCGCGCTTCGGGGG  
Seq1 -----CCGGCATCCATGGCGAGCGCGGGCGCGCTTCGGGGG  
Seq2 -----GTGCGA-----CCGGAATTAATGGCGAGCGCGGGCGCGCTTCGGGGG

**SUM159 ARIH1 sh5 hnRNP E1 CRISPR clone 54 product (550 bp)**

Ref TCGCGGATCTCTTTGATCTTACACCCGCCTTTCCCAATCAGGGAGCCGCACTGGGTGGCCGGCACCACCAGCCTCAGGGTGACCGGGGGCTGCTGGCCG  
Seq1 TCGCGGATCTCTTTGATCTTACACCCGCCTTTCCCAATCAGGGAGCCGCACTGGGTGGCCGGCACCACCAGCCTCAGGGTGACCGGGGGCTGCTGGCCG  
Seq2 TCGCGGATCTCTTTGATCTTACACCCGCCTTTCCCAATCAGGGAGCCGCTGCTGATTGGCAAGCACTTCCAGACTGAAGGTGAGGGGGGGCCGAGGGAT

Ref CGGTACTGT-TGGTCATGGAGCTGTTGATATCTT-----CCTCCA-GCTTGTGCGATGATCATAGCGAAAGCCTTAA-AGA-TGGCATTGGTGGGGCCG  
Seq1 CGGTACTGT-TGGTCATGGAGCTGTTGATATCTT-----CCTCCA-GCTTGTGCGATTATCATAGCGAAAGCCTTAA-AGA-TGGCATTGGTGGGGCCG  
Seq2 CAGT-CTCTCCGGACAATTACCTGCTGATATGTTGATCCGCGCTCCACTCTCCTCTCAGATCCT-----CTTAACCGACTCCCCTTCTTCGGCCG

Ref GTCAGAGTGATGATTCTCTCCGGACAATTCCCTCCGAGATGTTGA--TCCGCGGCCACTCTCCTCGCGGATCCTCTTAACCGACTCCCCTTCTTCC  
Seq1 GTCAGAGTGATGATTCTCTCCGGACAATTCCCTCCGAGATGTTGA--TCCGCGGCCACTCTCCTCGCGGATCCTCTTAACCGACTCCCCTTCTTCC  
Seq2 G-CAGAATGATGATTCTCTTCCGACCAATTCCCTCCAAAAGT-GAGAGTCCCGC--CACTCCCCTTCCGATCCTCTTAACCGACTCCCCTTCTTCGTCG

Ref CAAT-GATGCTTCTACTTCCCTTCCGTGCATAAGAAGCCGAATGGTGAGAGTCACATTTAGTCCA**C-TTTCAGTCACACCGGCAT**CCATGGCGAGCGGC  
Seq1 CAAT-GATGCTTCTACTTCCCTTCCGTGCATAAGAAGCCGAATGGTGAGAGTCACATTTAGTCCAC-TTTCAGTCACACCGGCATCCATGGCGAGCGGC  
Seq2 GAATGGATGCT-CCGACTTCTTTCGTGGATTAGAAAGCAAAGGTGAGAAGCACATTTAATCCACTTTTCATTCGCCCGTTTCATTGGAAGGGGG

**SUM159 ARIH1 sh5 hnRNP E1 CRISPR clone 11 product (550 bp)**

Ref TCGCGGATCTCTTTGATCTTACACCCGCCTTTCCCAATCAGGGAGCCGCACTGGGTGGCCGGCACCACCAGCCTCAGGGTGACCGGGGGCTGCTGGCCG  
Seq1 TCGCGGATCTCTTTGATCTTACACCCGCCTTTCCCAATCAGGGAGCCGCACTGGGTGGCCGGCACCACCAGCCTCAGGGTGACCGGGGGCTGCTGGCCG  
Seq2 TCGCGGATCTCTTTGATCTTACACCCGCCTTTCCCAATCAGGGAGCCGCACTGGGTGGCCGGCACCACCAGCCTCAGGGTGACCGGGGGCTGCTGGCCG

Ref CGGTACTGTTGGTCATGGAGCTGTTGATATCTTCCCTCCAGCTTGTGCGATGATCATAGCGAAAGCCTTAAAGATGGCATTGGTGGGGCCGGTCAGAGTGAT  
Seq1 CGGTACTGTTGGTCATGGAGCTGTTGATATCTTCCCTCCAGCTTGTGCGATGATCATAGCGAAAGCCTTAAAGATGGCATTGGTGGGGCCGGTCAGAGTGAT  
Seq2 CGGTACTGGTGGGCATGGAGCTGTTGATATCTTCCCTCCAGCTTGGCGATGATCATACGAAAGCCTTAAAGATGGGATTGGTGGGGCCGGCAGAATGAT

Ref GATTCTCTCCGGACAATTCCCTCCGAGATGTTGATCCGCGGCCACTCTCCTCGCGGATCCTCTTAACCGACTCCCCTTCTTCCCAATGATGCTTCCT  
Seq1 GATTCTCTCCGGACAATTCCCTCCGAGATGTTGATCCGCGGCCACTCTCCTCGCGGATCCTCTTAACCGACTCCCCTTCTTCCCAATGATGCTTCCT  
Seq2 GAATCTCTCCGGACAATTCCCTCCGAGATGTTGATCCGCGGCCACTCTCCTCGCGGATCCTCTTAACCGACTCCCCTTCTTCCCAATGATGCTTCCT

Ref ACTTCCTTTCCGTGCATAAGAAGCCGAATGGTGAGAGTCACATTTAGTCCA**CTTTCAGTCACACCGGCAT**CCATGGCG  
Seq1 ACTTCCTTTCCGTGCATAAGAAGCCGAATGGTGAGAGTCACATTTAGTCCA**CTTTCAGTCACACCGGCAT**CCATGGCG  
Seq2 ACTTCCTTTCCGTGCATAAGAAGCCGAATGGTGAGAGTCACATTTAATCCACTT-CAGTCACACCGGCATCCATGGCG

**SUM159 ARIH1 sh5 hnRNP E1 CRISPR clone 37 product (550 bp)**

Ref TCGCGGATCTCTTTGATCTTACACCCGCCTTTCCCAATCAGGGAGCCGCACTGGGTGGCCGGCACCACCAGCCTCAGGGTGACCGGGGGCTGCTGGCCG  
Seq1 TCGCGGATCTCTTTGATCTTACACCCGCCTTTCCCAATCAGGGAGCCGCACTGGGTGGCCGGCACCACCAGCCTCAGGGTGACCGGGGGCTGCTGGCCG  
Seq2 TCGCGGATCTCTTTGATCTTACACCCGCCTTTCCCAATCAGGGAGCCGCACTGGGTGGCCGGCACCACCAGCCTCAGGGTGACCGGGGGCTGCTGGCCG

Ref CGGTACTGTTGGTCATGGAGCTGTTGATATCTTCCCTCCAGCTTGTGCGATGATCATAGCGAAAGCCTTAAAGATGGCATTGGTGGGGCCGGTCAGAGTGAT  
Seq1 CGGTACTGTTGGTCATGGAGCTGTTGATATCTTCCCTCCAGCTTGTGCGATGATCATAGCGAAAGCCTTAAAGATGGCATTGGTGGGGCCGGTCAGAGTGAT  
Seq2 CGGTACTGTTGGTCATGGAGCTGTTGATATCTTCCCTCCAGCTTGTGCGATGATCATAGCGAAAGCCTTAAAGATGGCATTGGTGGGGCCGGTCAGAGTGAT

Ref GATTCTCTCCGGACAATTCCCTCCGAGATGTTGATCCGCGGCCACTCTCCTCGCGGATCCTCTTAACCGACTCCCCTTCTTCCCAATGATGCTTCCT  
Seq1 GATTCTCTCCGGACAATTCCCTCCGAGATGTTGATCCGCGGCCACTCTCCTCGCGGATCCTCTTAACCGACTCCCCTTCTTCCCAATGATGCTTCCT  
Seq2 GATTCTCTCCGGACAATTCCCTCCGAGATGTTGATCCGCGGCCACTCTCCTCGCGGATCCTCTTAACCGACTCCCCTTCTTCCCAATGATGCTTCCT

Ref ACTTCCTTTCCGTGCATAAGAAGCCGAATGGTGAGAGTCACATTTAGTCCA**CTTTCAGTCACACCGGCAT**CCATGGCG  
Seq1 ACTTCCTTTCCGTGCATAAGAAGCCGAATGGTGAGAGTCACATTTAGTCCA**CTTTCAGTCACACCGGCAT**CCATGGCG  
Seq2 ACTTCCTTTCCGTGCATAAGAAGCCGAATGGTGAGAGTCACATTTAGTCCA**CTTTCAGTCACACCGGCAT**CCATGGCG
